# Supplementary material for: Ligand based pharmacophore modelling and integrated computational approaches in the quest for small molecule inhibitors against hCA IX
Source: Royal Society of Chemistry journal article supplement (doi:10.1039/d3ra08618f), 2024-01-01
Supplement: d3ra08618f2.pdf [file d3ra08618f2.pdf]

Ligand based pharmacophore modelling and integrated computational approaches in the  
quest of small molecule inhibitor against hCA IX

| S.No | SMILES |
|------|--------|
|------|--------|

Ligand based pharmacophore modelling and integrated computational approaches in the quest of small molecule inhibitor against hCA IX

| 1         | <chem>CC(NC1=NN=C(S(=O)(N)=O)S1)=O</chem>                                      |               |       |                                 |
|-----------|--------------------------------------------------------------------------------|---------------|-------|---------------------------------|
| Ligand ID | ZINC ID                                                                        | Docking score | RMSD  | Amino acid interaction          |
| 3         | V1<br>Zinc00151360                                                             | -6.47         | 0.841 | HIS 94, ZN 301                  |
|           | V2<br>Zinc00342043                                                             | -6.80         | 0.916 | THR 199, ASN 62, SER 65, ZN 301 |
| 4         | V3<br>Zinc70666499                                                             | -7.10         | 0.950 | ARG 18, ZN 301                  |
| 5         | <chem>O=S(C1=CC=C(N2C=C(C3=CC=CC=C3)N=N2)C=C1)(N)=O</chem>                     |               |       |                                 |
| 6         | <chem>CC1=C(NC(NCC2=CC(S(=O)(N)=O)=CC=C2)=O)OC3=CC=CC=C13</chem>               |               |       |                                 |
| 7         | <chem>O=S(C1=CC=CC(CNC(NC2=CC3=CC(Br)=CC=C3O2)=O)=C1)(N)=O</chem>              |               |       |                                 |
| 8         | <chem>NS(C1=CC=C(NC(NC2=NC(C)=C(C)N=C2C)=O)C=C1)(=O)=O</chem>                  |               |       |                                 |
| 9         | <chem>CN1C[C@@H]2[C@@H](C[C@@H]([C@]2(C(=O)O)NC(=O)CS(=O)(=O)N)O)C(=O)N</chem> |               |       |                                 |
| 10        | <chem>C1=CC(=C(C=C1C/C(=N\O)/C(=O)NCCS(=O)(=O)N)Br)O</chem>                    |               |       |                                 |
| 11        | <chem>O=C([Se]CC#C)CC(C1=C2C=CC(OC)=C1)=C(C)N2C(C3=CC=C(Cl)C=C3)=O</chem>      |               |       |                                 |
| 12        | <chem>FC(F)(F)C1=CC=CC(NC2=C(C([Se]CC#C)=O)C=CC=C2)=C1</chem>                  |               |       |                                 |

**Table S1.** Active Compounds used in the pharmacophore validation.

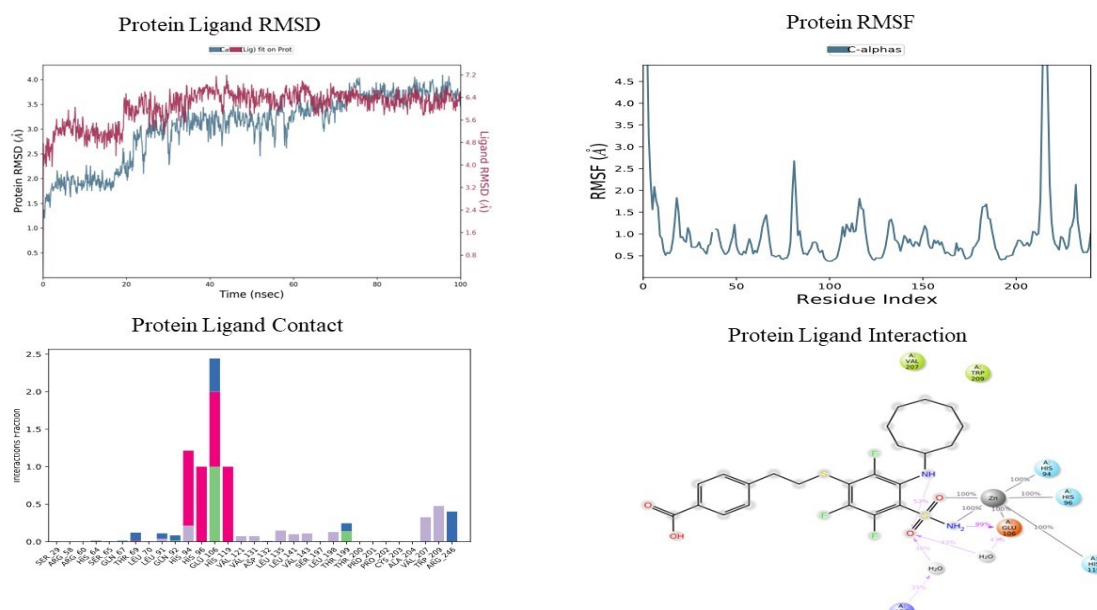

**Figure S1.** Molecular dynamics simulation data of the Apoprotein.

Ligand based pharmacophore modelling and integrated computational approaches in the quest of small molecule inhibitor against hCA IX

|     |              |       |       |                                  |
|-----|--------------|-------|-------|----------------------------------|
| V4  | Zinc02420638 | -5.97 | 0.761 | THR 199, HIS 94                  |
| V5  | Zinc18137077 | -5.89 | 0.929 | GLN 92, ZN 301                   |
| V6  | Zinc01767896 | -5.80 | 0.593 | ASN 62, GLN 92                   |
| V7  | Zinc03844670 | -7.19 | 0.881 | THR 199, HIS 94, ZN 301          |
| V8  | Zinc13532309 | -5.58 | 0.957 | VAL 121, ZN 301                  |
| V9  | Zinc03845641 | -6.09 | 0.606 | GLN 92, ASN 62                   |
| V10 | Zinc01704331 | -5.60 | 0.957 | HIS 94, ZN 301                   |
| V11 | Zinc00536677 | -6.11 | 0.906 | ASN 62, HIS 94                   |
| V12 | Zinc01505327 | -6.38 | 0.770 | HIS 94                           |
| V13 | Zinc00003955 | -7.08 | 0.835 | ZN 301                           |
| V14 | Zinc38440019 | -6.87 | 0.818 | GLN 92, GLN 67, ZN 301           |
| V15 | Zinc04994155 | -6.03 | 0.936 | HIS 96, ZN 301                   |
| V16 | Zinc0049817  | -6.28 | 0.886 | HIS 94, ZN 301                   |
| V17 | Zinc04701335 | -7.18 | 0.631 | THR 199, ZN 301                  |
| V18 | Zinc11689965 | -7.71 | 0.704 | HIS 94, THR 199, SER 197, ZN 301 |
| V19 | Zinc72324703 | -7.22 | 0.404 | THR 199, ARG 60, ZN 301          |
| V20 | Zinc04180215 | -5.65 | 0.498 | HIS 94, ARG 18, ZN 301           |
| V21 | Zinc68572305 | -6.04 | 0.917 | ASN 62, ZN 301                   |
| V22 | Zinc19703228 | -6.57 | 0.830 | VAL 121, ZN 301                  |
| V23 | Zinc19732669 | -5.96 | 0.954 | HIS 94, GLN 92, ASN 62           |
| V24 | Zinc03847982 | -5.85 | 0.920 | GLN 92, ZN 301                   |
| V25 | Zinc12620605 | -6.34 | 0.956 | THR 199, GLN 92, ASN 62          |
| V26 | Zinc00518929 | -7.05 | 0.795 | LEU 198, THR 199, ZN 301         |
| V27 | Zinc02168937 | -6.44 | 0.576 | LEU 91, THR 199, ZN 301          |
| V28 | Zinc03846889 | -6.74 | 0.933 | THR 199, ZN 301                  |
| V29 | Zinc04261842 | -6.64 | 0.769 | THR 199, HIS 94, ZN 301          |
| V30 | Zinc04504454 | -6.43 | 0.764 | HIS 94, ZN 301                   |
| V31 | Zinc01675744 | -6.39 | 0.855 | ASN 62                           |
| V32 | Zinc20112806 | -6.87 | 0.967 | GLN 92, ZN 301                   |
| V33 | Zinc13544730 | -6.64 | 0.551 | THR 199, ZN 301                  |
| V34 | Zinc13406180 | -8.07 | 0.737 | GLN 92, ZN 301                   |
| V35 | Zinc09419065 | -8.05 | 0.895 | ZN 301, HIS 96, THR 199          |
| V36 | Zinc25315630 | -6.96 | 0.567 | ZN 301, HIS 94                   |
| V37 | Zinc04528652 | -6.89 | 0.922 | THR 199, ZN 301                  |
| V38 | Zinc68581601 | -6.06 | 0.494 | ASN 62, THR 199, ZN 301          |
| V39 | Zinc14658109 | -7.01 | 0.796 | HIS 94                           |
| V40 | Zinc03844579 | -6.90 | 0.769 | HIS 94, VAL 121, ZN 301          |
| V41 | Zinc03844582 | -6.92 | 0.767 | THR 199, THR 69, ZN 301          |
| V42 | Zinc70666213 | -6.40 | 0.950 | ASN 244, HIS 94                  |
| V43 | Zinc04267306 | -7.13 | 0.928 | HIS 94, ZN 301                   |

Ligand based pharmacophore modelling and integrated computational approaches in the quest of small molecule inhibitor against hCA IX

|                 |               |       |  |                                 |
|-----------------|---------------|-------|--|---------------------------------|
| <b>Standard</b> | Acetazolamide | -5.96 |  | HIS 94, ASN 62, THR 200, ZN 301 |
|-----------------|---------------|-------|--|---------------------------------|

**Table S2.** Lead compounds generated from Zinc database with its ZINC ID, RMSD value, Binding score, and Amino acid residue.
